# Supplementary material for: Study of CdS/CdS Nanoparticles Thin Films Deposited by Soft Chemistry for Optoelectronic Applications
Source: MDPI journal article supplement (doi:10.3390/mi14061168), 2023-05-31
Supplement: s1 [file s1]

Supplementary Materials

# Study of CdS/CdS Nanoparticles Thin Films Deposited by Soft Chemistry for Optoelectronic Applications

Laura Aislinn Carrasco-Chavez <sup>1</sup>, José F. Rubio-Valle <sup>2</sup>, Abimael Jiménez-Pérez <sup>1</sup>, José E. Martín-Alfonso <sup>2,\*</sup> and Amanda Carrillo-Castillo <sup>1,\*</sup>

- <sup>1</sup> Institute of Engineering and Technology, Autonomous University of Ciudad Juárez, Juárez Chihuahua 32310, Mexico; al187107@alumnos.uacj.mx (L.A.C.-C.); abimael.jimenez@uacj.mx (A.J.-P.)  
<sup>2</sup> Chemical Product and Process Technology Research Center (Pro<sup>2</sup>TecS), Department of Chemical Engineering and Materials Science, University of Huelva, 21071 Huelva, Spain; josefernando.rubio@diq.uhu.es  
 \* Correspondence: jose.martin@diq.uhu.es (J.E.M.-A.); amanda.carrillo@uacj.mx (A.C.-C.); Tel.: +34-959-218204 (J.E.M.-A.); +52-1-656-688-4800 (A.C.-C.)

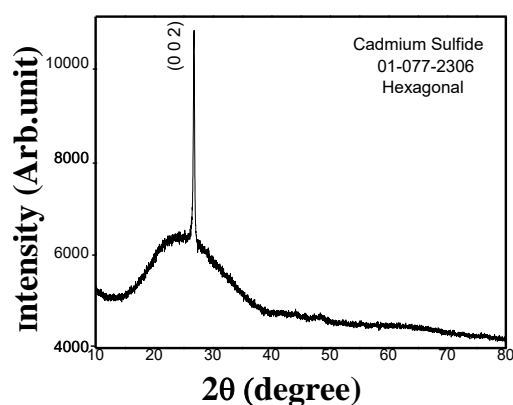

(a)

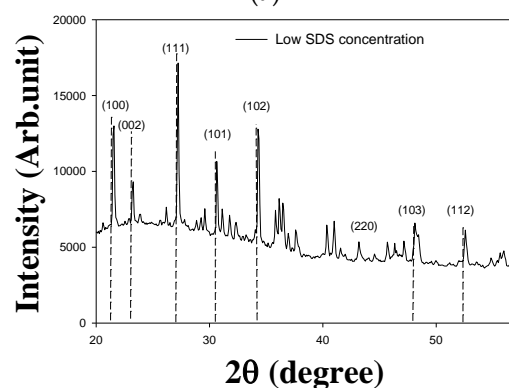

(b)

**Figure S1.** X-ray diffraction pattern reported for (a) CdS in two layers without annealing reported by (Palma-Soto et al. 2021) [39] and (b) CdS Nps as-synthesized (Carrillo et al. 2012) [47].
